# Supplementary material
Source: PubMed Central journal article supplement (PMC2711717)

# Supplement 1A

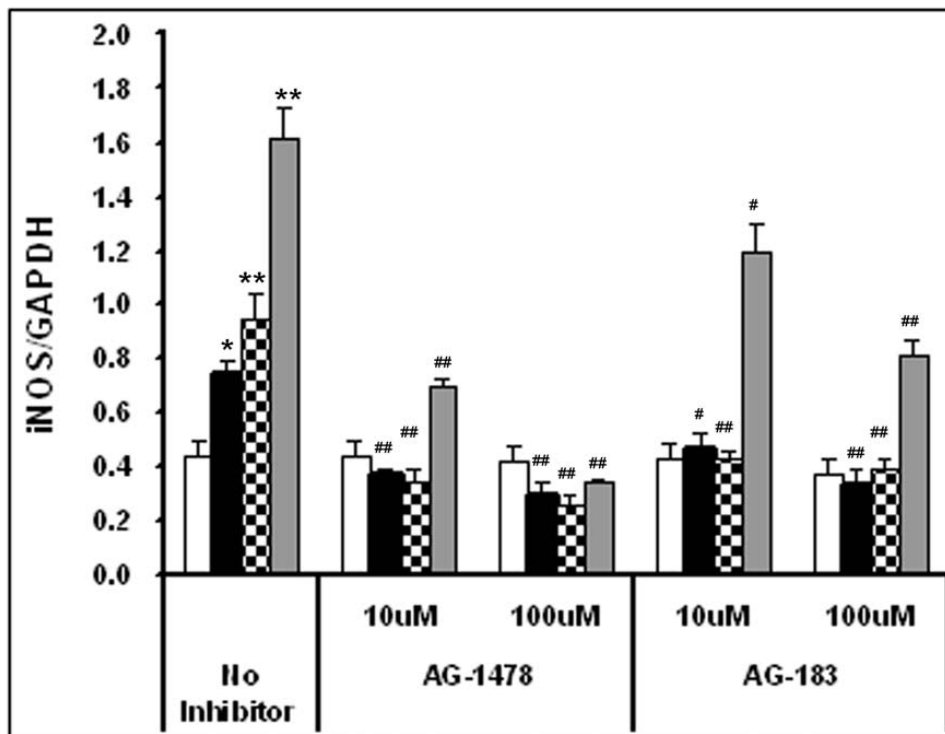

# Supplement 1B

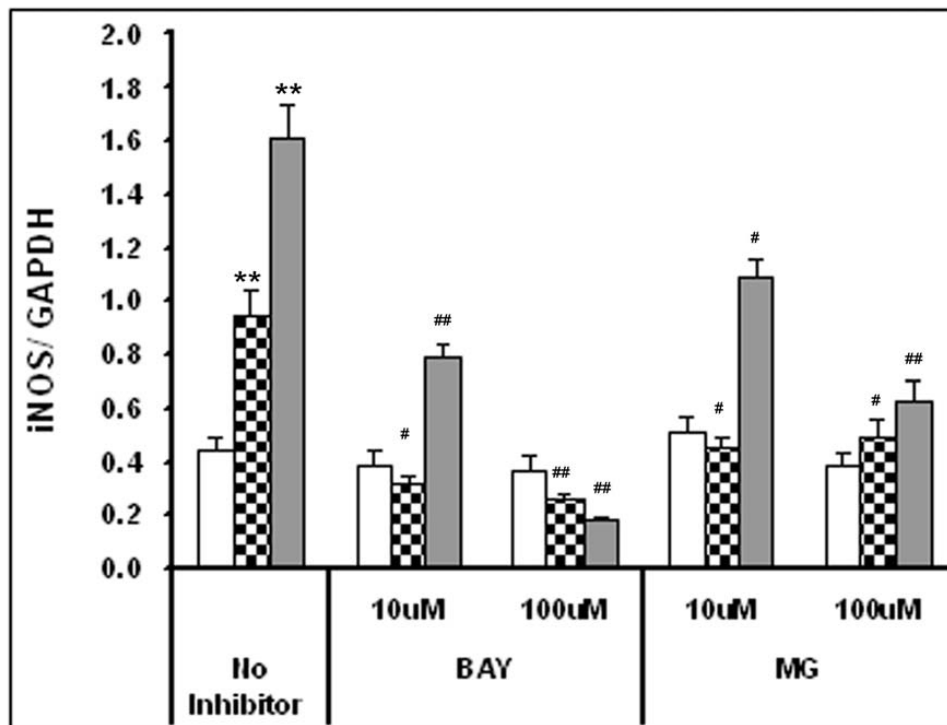

# Supplement 1C

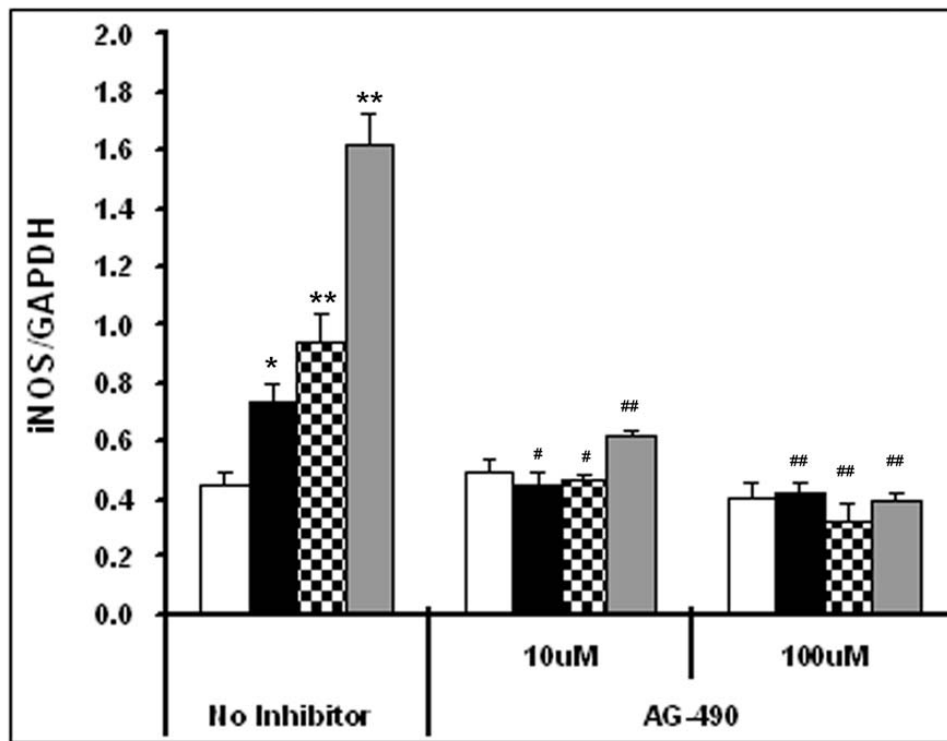

Supplement: 90752.2008_1.pdf [file 90752.2008_1.pdf]
